# Supplementary material for: Photochemically activated atomic ruthenium supported on boron-doped carbon as a robust electrocatalyst for hydrogen evolution
Source: Royal Society of Chemistry journal article supplement (doi:10.1039/d0ta02107e), 2020-01-01
Supplement: d0ta02107e1.pdf [file d0ta02107e1.pdf]

## Supporting Information

### Photochemical Activated Atomic Ruthenium Supported on Boron-Doped Carbon as a Robust Electrocatalyst for Hydrogen Evolution

*Yihuan Yu, Shaoxuan Yang, Meiling Dou, Zhengping Zhang<sup>a,b</sup>\*, Feng Wang<sup>a,b</sup>\**

<sup>a</sup> State Key Laboratory of Chemical Resource Engineering, Beijing Key Laboratory of Electrochemical Process and Technology for Materials, Beijing University of Chemical Technology, Beijing 100029, P. R. China

<sup>b</sup> Beijing Advanced Innovation Center for Soft Matter Science and Engineering, Beijing University of Chemical Technology, Beijing 100029, P. R. China

E-mail: wangf@mail.buct.edu.cn; zhangzhengping@mail.buct.edu.cn

## Experimental Methods

**Materials.** Boric acid, phenol, ethanol, formaldehyde (37 wt.%), sodium hydroxide (NaOH), hydrochloric acid (HCl ~35%), urea, isopropanol, ruthenium trichloride and commercial RuO<sub>2</sub> were purchased from Sinopharm. High purity argon and nitrogen gas were bought from Beijing AP BAIF Gases Industry Co. Ltd. Pluronic F127, Commercial Ru/C (5 wt.%), Commercial Pt/C (20 wt.%), and Nafion solution (5 wt.%) were purchased from Sigma-Aldrich, Johnson Matthey and DuPont, respectively. Ultrapure water (18.2 MΩ cm) obtained from a water purification system (TTL-6B) without further purity.

**Material Characterization.** Powder X-ray diffraction (XRD) patterns were profiled on a X-ray diffractometer (D/max-2500, Rigaku, Japan) with Cu K $\alpha$  radiation ( $\lambda = 1.54056 \text{ \AA}$ ) source. Scanning electron microscopy (SEM) and high-resolution transmission electron microscopy (HR-TEM) images were taken on the FE-JSM-6701F (JEOL, Japan) and JSM-2100 (JEOL, Japan) microscopes, respectively. The high-angle annular dark-field and annular bright-field scanning transmission electron microscope (HADDF-STEM, ABF-STEM) images were taken on JEM-ARM200F. The Brunauer-Emmett-Teller (BET) specific surface area and pore size distribution were determined by nitrogen adsorption-desorption measurements with a Quantachrome AUTOSORB-SI instrument. Raman spectra were recorded with a Horiba Jobin Yvon LabRam HR800 confocal microscope using a laser of 632.8 nm. The X-ray photoelectron spectroscopy (XPS) was performed with the Thermo Fisher Scientific ESCALAB 250 spectrometer using the C 1s peak (285 eV) as the reference for binding energy calibration. The actual Ru content was measured by inductively coupled plasma atomic emission spectroscopy (ICP-AES) was performed by (7700, Agilent Technologies Inc., U.S.A.).

**Electrochemical Measurements.** All the electrochemical measurements were conducted with a standard three electrode system controlled by a CHI 760E electrochemistry workstation. Catalyst powders cast on the L-type glassy carbon electrode was used as work electrode, commercial dimensionally stable anode (DSA) was used as the counter electrode and saturated calomel electrode as the reference electrode. The reference electrode was calibrated against and converted to reversible hydrogen electrode (RHE). Linear sweep voltammetry (LSV) was carried out at 5 mV/s for the polarization curves. The hybrid catalyst was cycled ~40 times by cyclic voltammetry (CV) until a stable CV curve was developed before measuring polarization curves of samples. All polarization curves were compensated with 100% *iR*-compensation. Electrochemical impedance spectroscopy (EIS) measurements were carried out from 100 kHz to 0.1 Hz with an amplitude of 5 mV at open-circuit voltage. The Faraday efficiency experiments involving rotating ring disk electrode (RRDE) were conducted with CHI 760E electrochemistry workstation using a standard three-electrode system at room temperature. A glassy carbon RRDE coated with electrocatalyst was used as the working electrode, a graphite rod and a saturated calomel electrode as the counter and reference electrodes, respectively. The working electrode continuously rotating at 1600 rpm to get rid of the hydrogen bubbles and the collection efficiency (*N*) of ring electrode is 0.37. All potentials reported in this work were in reference to the reversible hydrogen electrode (RHE). In a typical preparation of working electrode, 10 mg of electrocatalyst was ultrasonically blending with 2.0 mL of ethanol and 20  $\mu$ L of Nafion (5 wt.%, Dupont) for 0.5 h to form a homogeneous electrocatalyst ink, 10  $\mu$ L of which was transferred onto the L-type glassy carbon electrode or RRDE, leading to a geometric loading of 0.394 mg cm<sup>-2</sup>. The commercial Pt/C (20 wt.% of Pt, Johnson Matthey) working electrode was also used as a reference with the Pt loading of 20  $\mu$ g cm<sup>-2</sup>. All the potentials were calibrated to

the potentials vs. RHE (Potentials vs. RHE = potential vs. SCE + 0.241 + 0.0591 \* pH V). The ORR experiments were carried out in 1 M KOH or 0.5 M H<sub>2</sub>SO<sub>4</sub> solution at the ambient temperature after being purged with N<sub>2</sub> gas for 20 min. The L-type glassy carbon electrode and glassy carbon rotating disk electrode are both 4 mm in diameter.

For the Turnover Frequency (TOF) calculation of the catalysts, The TOF value is calculated from the equation:

$$\text{TOF} = \frac{I}{2Fn}$$

where  $I$  is the current (A) during linear sweep measurement,  $F$  is the Faraday constant (C/mol),  $n$  is the number of metal amount (mol). The factor 1/2 is based on the consideration that two electrons are required to form one hydrogen molecule.

**Computational Approach.** The density functional theory (DFT) calculations were conducted by the program DMol3 Materials Studio (Accelrys Inc.) with Perdew-Burke-Ernzerhof generalized gradient approximation (PBE-GGA) correlation functional. Spin-unrestricted has also been considered in our calculation when it is necessary. For all theoretical models, the convergence threshold was set as 10<sup>-5</sup> eV in energy. The adsorption free energy of atomic hydrogen ( $\Delta G_{\text{H}^*}$ ) was calculated by the equation  $\Delta G_{\text{H}^*} = \Delta E_{\text{H}^*} + \Delta \text{ZPE} - T\Delta S$ , where  $\Delta E_{\text{H}^*}$  is the differential hydrogen adsorption energy,  $\Delta \text{ZPE}$  is the difference in zero point energy between the adsorbed hydrogen and hydrogen in the gas phase and  $\Delta S$  is the entropy difference between the adsorbed state and the gas phase. The contribution from the configurational entropy in the adsorbed state is small and is neglected. We can take the entropy of hydrogen adsorption as  $\Delta S = 1/2 S_{\text{H}_2}$  where  $S_{\text{H}_2}$  is the entropy of molecule hydrogen in the gas phase at standard conditions. In this work, the  $\Delta \text{ZPE}$  and  $T\Delta S$  were

computed by following the scheme proposed by Nørskov et al.

## Supporting Results and Discussion.

**Table S1.** Pore characteristics of MCS, BMCS, Ru-N/BC, Ru/BC, Ru-N/C and Ru/C.

| <b>sample</b> | <b>S<sub>BET</sub></b><br><b>(m<sup>2</sup> g<sup>-1</sup>)</b> | <b>S<sub>micro</sub></b><br><b>(m<sup>2</sup> g<sup>-1</sup>)</b> | <b>S<sub>meso</sub></b><br><b>(m<sup>2</sup> g<sup>-1</sup>)</b> | <b>Volume</b><br><b>(cm<sup>3</sup> g<sup>-1</sup>)</b> | <b>V<sub>micro</sub></b><br><b>(cm<sup>3</sup> g<sup>-1</sup>)</b> | <b>V<sub>meso</sub></b><br><b>(cm<sup>3</sup> g<sup>-1</sup>)</b> |
|---------------|-----------------------------------------------------------------|-------------------------------------------------------------------|------------------------------------------------------------------|---------------------------------------------------------|--------------------------------------------------------------------|-------------------------------------------------------------------|
| BMCS          | 953                                                             | 496                                                               | 457                                                              | 0.696                                                   | 0.206                                                              | 0.490                                                             |
| Ru/BC         | 899                                                             | 480                                                               | 419                                                              | 0.647                                                   | 0.199                                                              | 0.448                                                             |
| Ru-N/BC       | 803                                                             | 415                                                               | 388                                                              | 0.545                                                   | 0.173                                                              | 0.372                                                             |
| MCS           | 869                                                             | 594                                                               | 275                                                              | 0.506                                                   | 0.258                                                              | 0.248                                                             |
| Ru/C          | 745                                                             | 578                                                               | 167                                                              | 0.414                                                   | 0.241                                                              | 0.173                                                             |
| Ru-N/C        | 697                                                             | 577                                                               | 120                                                              | 0.373                                                   | 0.229                                                              | 0.144                                                             |

**Table S2.** The Ru content of Ru/C, Ru-N/C, Ru/BC, Ru-N/BC measured by inductively coupled plasma atomic emission spectroscopy (ICP-AES).

| <b>sample</b>  | <b>wt. %</b> |
|----------------|--------------|
| Ru/C           | 0.56%        |
| Ru-N/C         | 0.54%        |
| Ru/BC          | 0.45%        |
| Ru-N/BC        | 0.46%        |
| Ru-N/BC-after* | 0.41%        |

\* Ru-N/BC-after chronopotentiometry tests in 0.5 M H<sub>2</sub>SO<sub>4</sub> solution.

**Table S3.** The C-, N-, O-, B- and Ru-content of BMCS, Ru/BC, Ru–N/BC, MCS, Ru/C and Ru–N/C.

| Sample      | C<br>(at.%) | O<br>(at.%) | B (at.%) |        |                   | Ru               |        | N (at.%) |           |        |          |            |
|-------------|-------------|-------------|----------|--------|-------------------|------------------|--------|----------|-----------|--------|----------|------------|
|             |             |             | total    | B-N    | BC <sub>2</sub> O | BCO <sub>2</sub> | (at.%) | Total    | Pyridinic | C-N-B  | pyrrolic | quaternary |
| BMCS        | 87.48       | 10.73       | 1.79     | -      | 67.89%            | 32.11%           | -      | -        | -         | -      | -        | -          |
| Ru/BC       | 83.89       | 15.32       | 1.87     | -      | 62.76%            | 37.24%           | 0.32   | -        | -         | -      | -        | -          |
| Ru–<br>N/BC | 84.85       | 11.93       | 1.39     | 20.44% | 55.16%            | 24.40%           | 0.54   | 1.29     | 23.84%    | 21.28% | 21.54%   | 33.34%     |
| MCS         | 92.11       | 7.89        | -        | -      | -                 | -                | -      | -        | -         | -      | -        | -          |
| Ru/C        | 81.83       | 17.35       | -        | -      | -                 | -                | 0.82   | -        | -         | -      | -        | -          |
| Ru–<br>N/C  | 84.83       | 12.59       | -        | -      | -                 | -                | 0.91   | 1.67     | 14.02%    | -      | 42.99%   | 42.99%     |

**Table S4.** The fitting Parameters of EXAFS fits for the Ru/C, Ru–N/C, Ru/BC and Ru–N/BC.

| Samples | First shell<br>path | Coordination<br>number* | Bond<br>length<br>R <sub>eff</sub> (Å) | Bond<br>length R<br>(Å) | R factor<br>(%) |
|---------|---------------------|-------------------------|----------------------------------------|-------------------------|-----------------|
| Ru/C    | Ru-C                | 3                       | 2.08                                   | 1.53                    | 0.002           |
| Ru–N/C  | Ru–N(C)             | 3                       | 2.02                                   | 1.50                    | 0.005           |
| Ru/BC   | Ru-C                | 3                       | 2.08                                   | 1.56                    | 0.010           |
| Ru–N/BC | Ru–N(C)             | 3                       | 1.76                                   | 1.38                    | 0.012           |

\*The coordination number was fixed during the fitting.

**Table S5.** Constraint parameters during the DFT geometry optimization.

| Samples | $\Delta E$ (Ha*) | $ \mathbf{F} _{\max}$<br>(Ha Å <sup>-1</sup> ) | $ \mathbf{dR} _{\max}$<br>(Å) |
|---------|------------------|------------------------------------------------|-------------------------------|
| Ru/C    | -0.0000199       | 0.000849                                       | 0.003554                      |
| Ru-N/C  | -0.0000099       | 0.000482                                       | 0.004375                      |
| Ru/BC   | -0.0000083       | 0.000501                                       | 0.002428                      |
| Ru-N/BC | -0.0000198       | 0.000731                                       | 0.004635                      |

Ha\* = 27.21 eV, the same below

**Table S6.** Calculated results of corresponding energy by using DFT method.

| sample  | $E_{\text{support/Ha}}$ | $E_{\text{metal/Ha}}$ | $E_{\text{electrocatalyst/Ha}}$ | $\Delta E_{\text{rem}^*/\text{Ha}}$ | $\Delta E_{\text{rem}/\text{eV}}$ |
|---------|-------------------------|-----------------------|---------------------------------|-------------------------------------|-----------------------------------|
| Ru-N/BC | -1810.57                | -4441.27              | -6252.01                        | 0.17                                | 4.62                              |
| Ru/BC   | -1776.83                | -4441.27              | -6218.19                        | 0.08                                | 2.18                              |
| Ru-N/C  | -1823.45                | -4441.27              | -6264.81                        | 0.09                                | 2.45                              |
| Ru/C    | -1790.56                | -4441.27              | -6231.86                        | 0.03                                | 0.82                              |

$$\Delta E_{\text{rem}^*} = E_{\text{support}} + E_{\text{metal}} - E_{\text{electrocatalyst}}$$



**Table S7.** Electrochemical impedance spectroscopy (EIS) measurement of Ru/BC, Ru-N/BC, Ru-N/C, Ru/C, commercial RuO<sub>2</sub>, commercial Ru/C (5 wt.%) and commercial Pt/C (20 wt.%).

| Sample                      | R <sub>s</sub> (Ohm) |                                     | R <sub>ct</sub> (Ohm) |                                     |
|-----------------------------|----------------------|-------------------------------------|-----------------------|-------------------------------------|
|                             | 1M KOH               | 0.5M H <sub>2</sub> SO <sub>4</sub> | 1M KOH                | 0.5M H <sub>2</sub> SO <sub>4</sub> |
| Ru-N/BC                     | 7.2                  | 12.5                                | 20.3                  | 32.6                                |
| Ru/BC                       | 7.4                  | 12.6                                | 55.1                  | 60.6                                |
| Ru-N/C                      | 7.9                  | 8.5                                 | 107.4                 | 150.0                               |
| Ru/C                        | 8.6                  | 8.8                                 | 203.0                 | 291.5                               |
| commercial RuO <sub>2</sub> | 9.7                  | 11.1                                | 76.5                  | 262.9                               |
| commercial Ru/C (5 wt.%)    | 8.6                  | 15.8                                | 45.6                  | 68.6                                |
| commercial Pt/C (20 wt.%)   | 9.3                  | 7.9                                 | 47.6                  | 15.9                                |

**Table S8.** The electrochemical performance of Ru/BC, Ru–N/BC, Ru–N/C, Ru/C, commercial RuO<sub>2</sub>, commercial Ru/C (5 wt.%) and commercial Pt/C (20 wt.%) in 1 M KOH

| Sample                       | $\eta$ @ 10mA<br>cm <sup>-2</sup> (mV) | $j_0^*$ (mA cm <sup>-2</sup> ) | Mass activity @ -<br>0.100 V* (mA ug <sup>-1</sup><br>metal) |
|------------------------------|----------------------------------------|--------------------------------|--------------------------------------------------------------|
| Ru–N/BC                      | 51                                     | 0.78                           | 19.56                                                        |
| Ru/BC                        | 73                                     | 0.52                           | 11.36                                                        |
| Ru–N/C                       | 98                                     | 0.45                           | 5.79                                                         |
| Ru/C                         | 100                                    | 0.39                           | 3.39                                                         |
| commercial Ru/C (5 wt.%)     | 82                                     | 0.63                           | 0.53                                                         |
| commercial<br>Pt/C (20 wt.%) | 64                                     | 0.21                           | 0.60                                                         |

**V\*:** versus reversible hydrogen electrode, vs. RHE, the same below

**$j_0^*$ :** Exchange current density, the same below

**Table S9.** The electrochemical performance of Ru/BC, Ru–N/BC, Ru–N/C, Ru/C, commercial RuO<sub>2</sub>, commercial Ru/C (5 wt.%) and commercial Pt/C (20 wt.%) in 0.5 M H<sub>2</sub>SO<sub>4</sub>

| Sample                       | $\eta$ @ 10mA<br>cm <sup>-2</sup> (mV) | $j_0^*$ (mA cm <sup>-2</sup> ) | Mass activity @ -<br>0.1 V* (mA ug <sup>-1</sup><br>metal) |
|------------------------------|----------------------------------------|--------------------------------|------------------------------------------------------------|
| Ru–N/BC                      | 79                                     | 0.51                           | 10.38                                                      |
| Ru/BC                        | 116                                    | 0.35                           | 3.32                                                       |
| Ru–N/C                       | 134                                    | 0.17                           | 1.65                                                       |
| Ru/C                         | 148                                    | 0.14                           | 1.22                                                       |
| commercial Ru/C (5 wt.%)     | 97                                     | 0.09                           | 0.72                                                       |
| commercial<br>Pt/C (20 wt.%) | 27                                     | 1.04                           | 2.01                                                       |

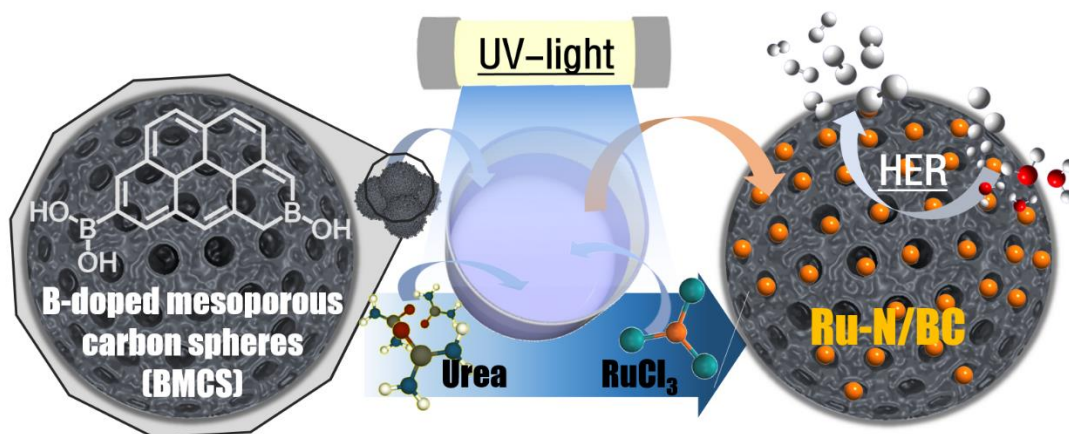

**Scheme S1.** The Schematic illustration of the synthesis of the Ru-N/BC electrocatalyst.

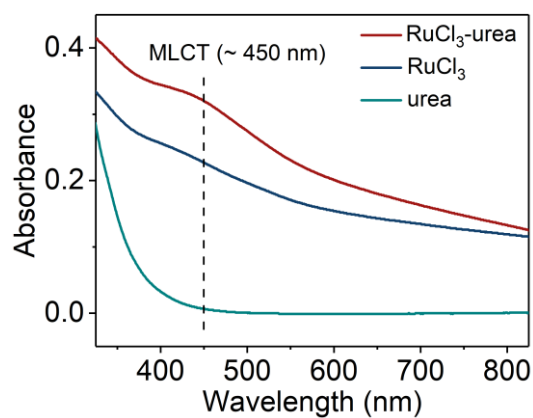

**Figure S1.** UV-Vis spectroscopy of  $\text{RuCl}_3$ , urea and  $\text{RuCl}_3$ -urea complex.

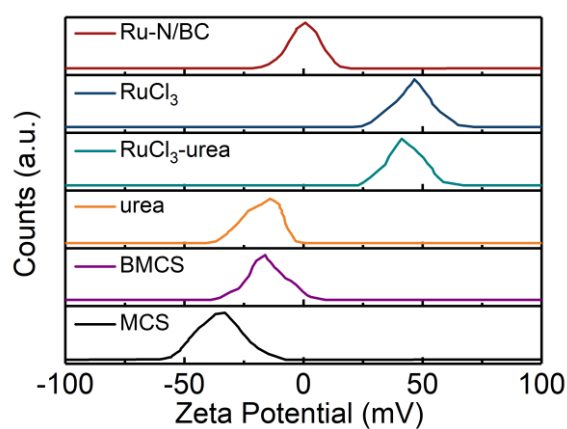

**Figure S2.** Zeta Potential of Ru-N/BC,  $\text{RuCl}_3$ , urea,  $\text{RuCl}_3$ -urea complex, BMCS and MCS.

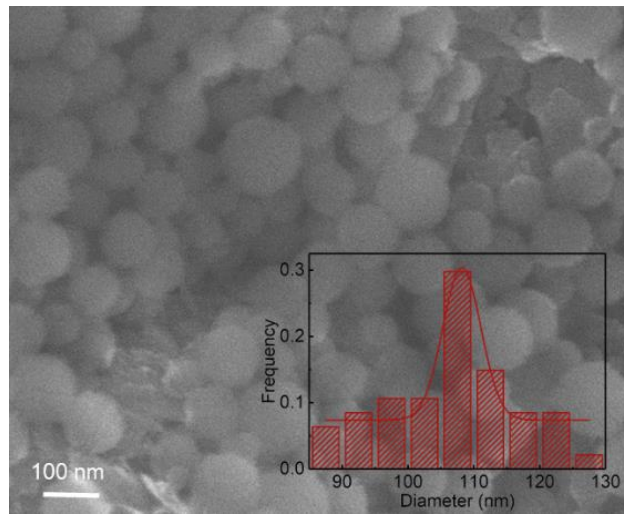

**Figure S3.** SEM image of resin spheres.

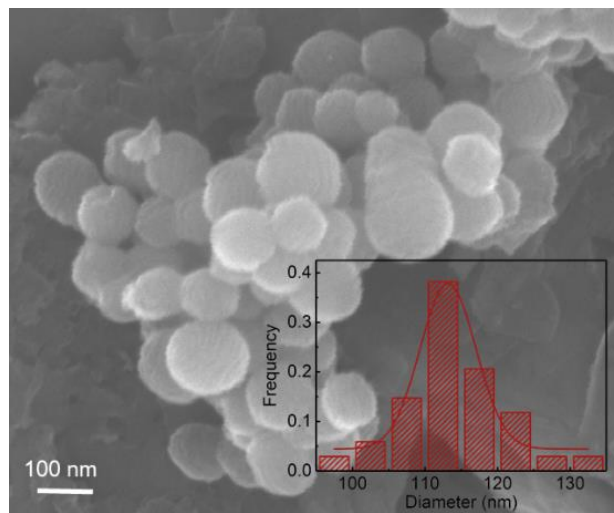

**Figure S4.** SEM image of BMCS.

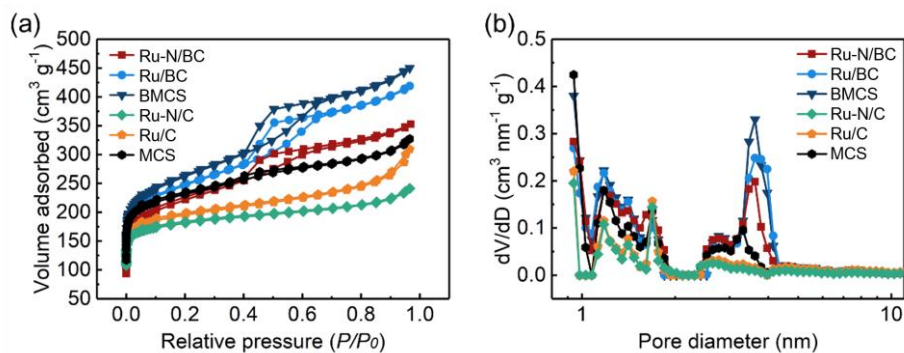

**Figure S5.** (a)  $N_2$  adsorption/desorption isotherms of Ru-N/BC, Ru/BC, BMCS, Ru-N/C, Ru/C and MCS and (b) corresponding pore size distribution plots.

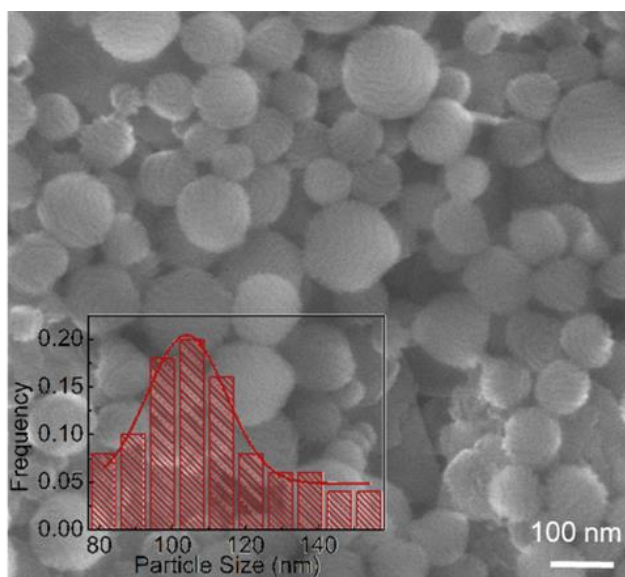

**Figure S6.** SEM image of Ru-N/BC.

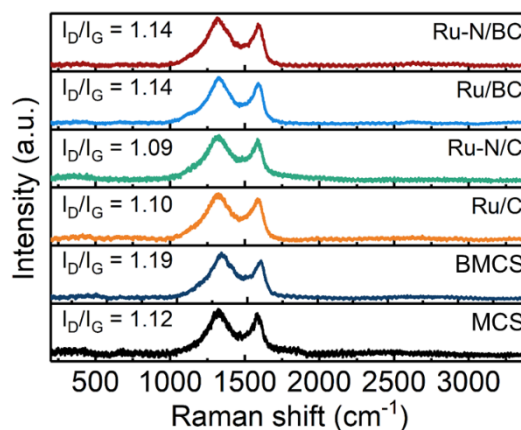

**Figure S7.** Raman spectra of Ru-N/BC, Ru/BC, Ru-N/C, Ru/C, BMCS and MCS.

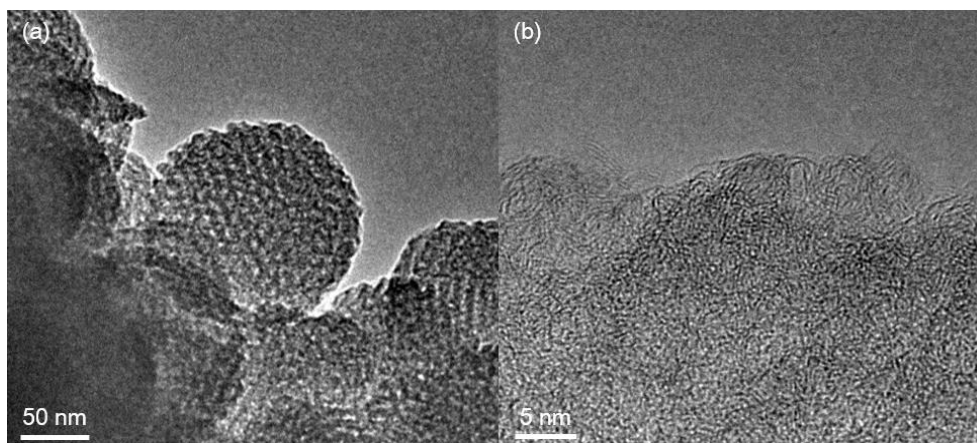

**Figure S8.** (a) TEM image of BMCS and (b) HR-TEM image of BMCS.

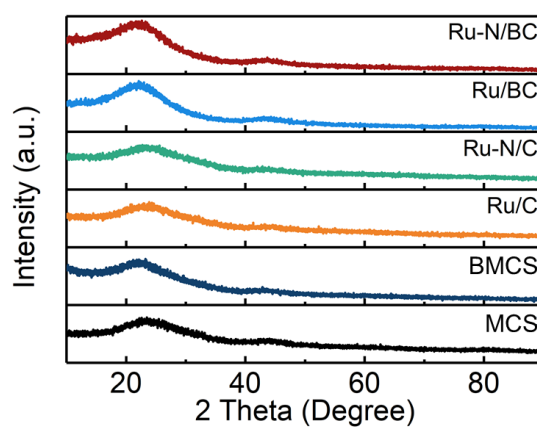

**Figure S9.** XRD patterns of Ru-N/BC, Ru/BC, Ru-N/C, Ru/C, BMCS and MCS.

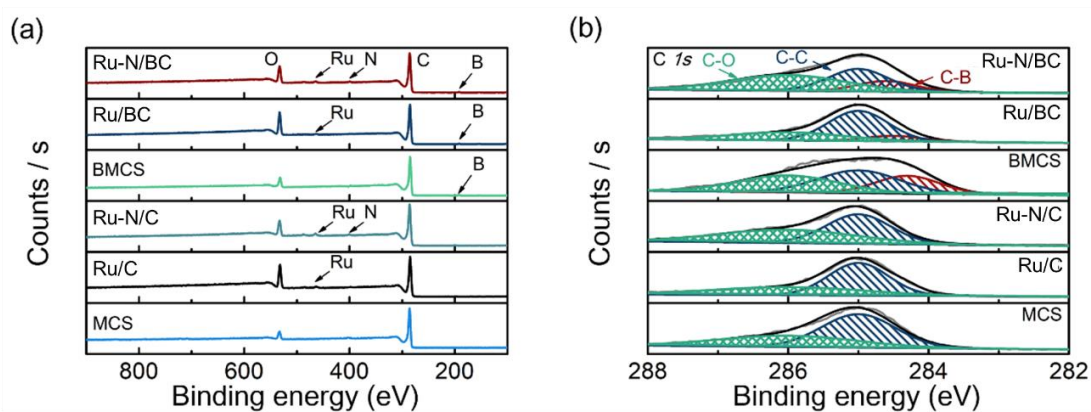

**Figure S10.** (a) The XPS survey spectra and (b) High-resolution XPS spectra of C 1s for Ru-N/BC, Ru/BC, BMCS, Ru-N/C, Ru/C and MCS.

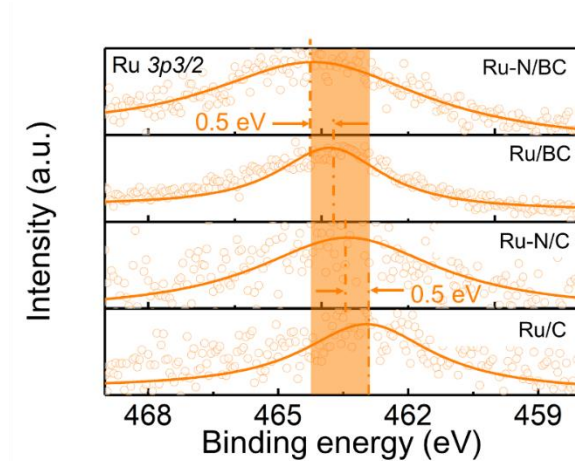

**Figure S11.** High-resolution XPS spectra of Ru 3p for Ru-N/BC, Ru/BC, Ru-N/C and Ru/C.

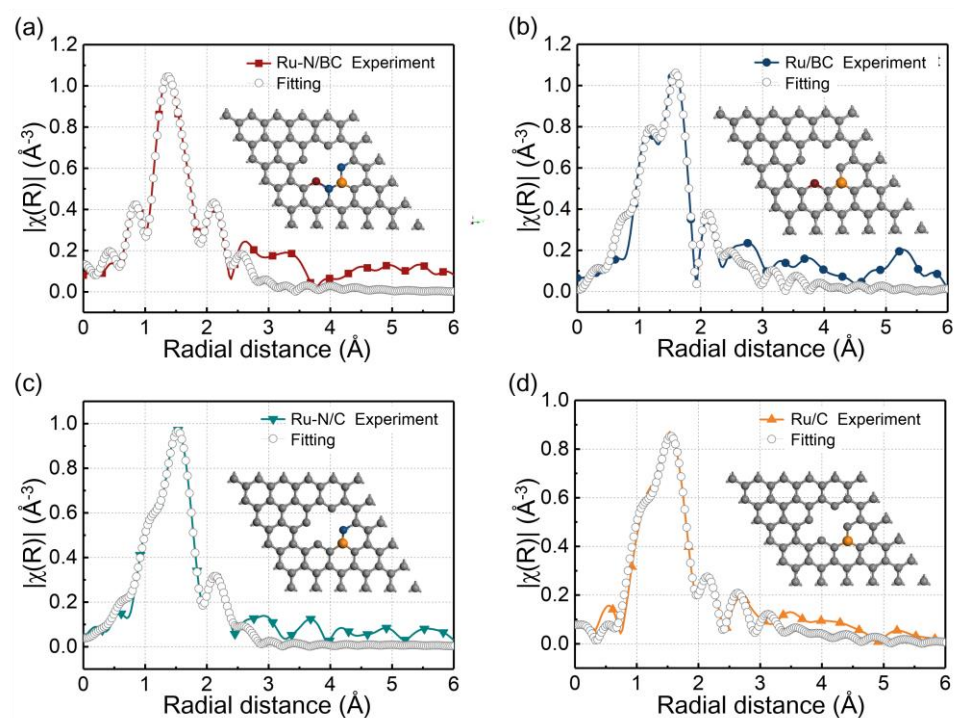

**Figure S12.** Comparison between the experimental EXAFS spectra of (a) Ru-N/BC, (b) Ru/BC, (c) Ru-N/C, and (d) Ru/C and the theoretical spectrum calculated from the depicted structures (inset)

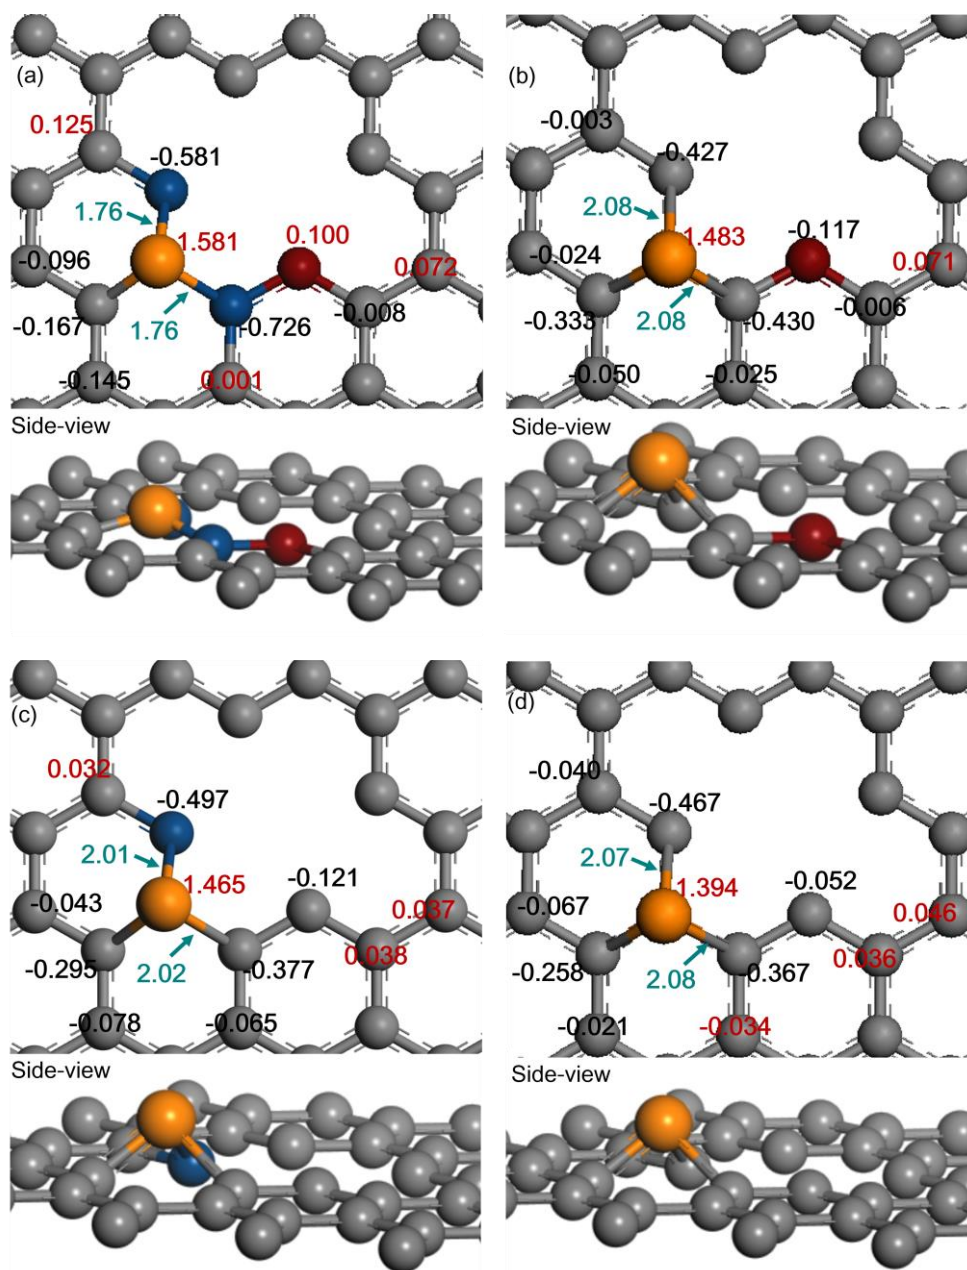

**Figure S13.** Charge distribution of the depicted structures of (a) Ru/BC, (b) Ru-N/C, (c) Ru/C and (d) Ru-N/BC



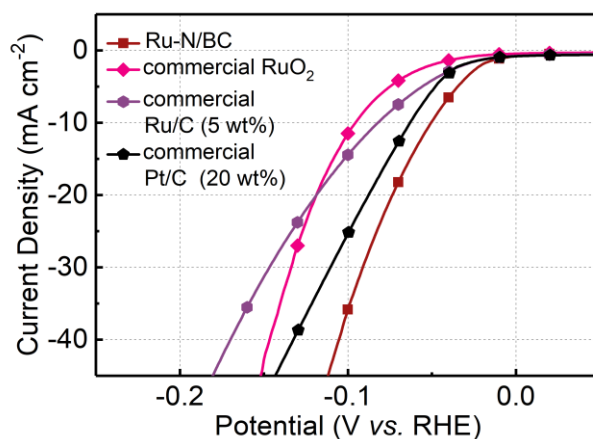

**Figure S14.** LSV plots of the Ru-N/BC, commercial RuO<sub>2</sub>, commercial Ru/C (5 wt.%) and commercial Pt/C (20 wt.%) electrodes in N<sub>2</sub>-saturated 1 M KOH solution at a sweep rate of 5 mV s<sup>-1</sup>.

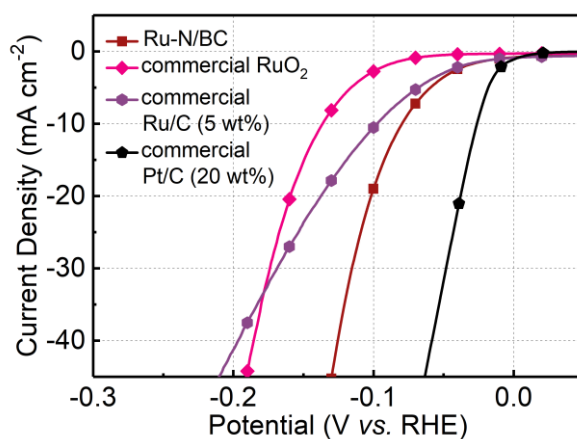

**Figure S15.** LSV plots of the Ru-N/BC, Ru/BC, Ru-N/C, Ru/C, commercial RuO<sub>2</sub>, commercial Ru/C (5 wt.%) and commercial Pt/C (20 wt.%) electrodes in N<sub>2</sub>-saturated 0.5 M H<sub>2</sub>SO<sub>4</sub> solution at a sweep rate of 5 mV s<sup>-1</sup>.

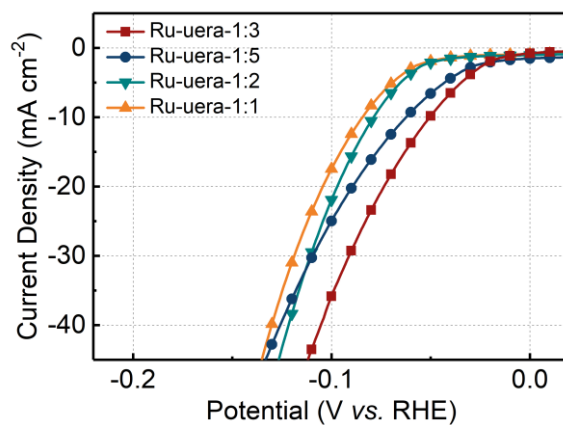

**Figure S16.** LSV plots of different molar ratio of Ru and urea ligands in Ru-N/BC electrodes in N<sub>2</sub>-saturated 1 M KOH solution at a sweep rate of 5 mV s<sup>-1</sup>.

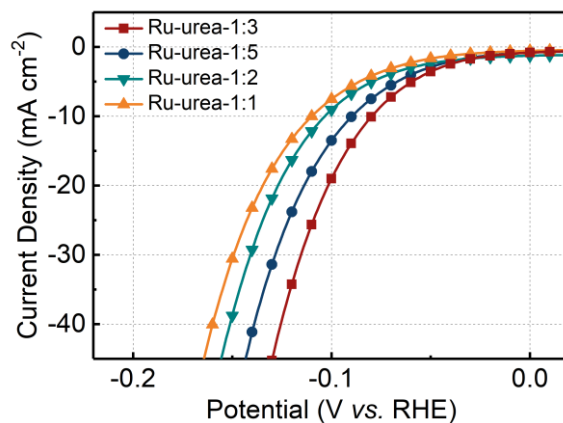

**Figure S17.** LSV plots of different molar ratio of Ru and urea ligands in Ru-N/BC electrodes in N<sub>2</sub>-saturated 0.5 M H<sub>2</sub>SO<sub>4</sub> solution at a sweep rate of 5 mV s<sup>-1</sup>.

Moreover, the effects of the different ligands and metal molar ratio were also considered.

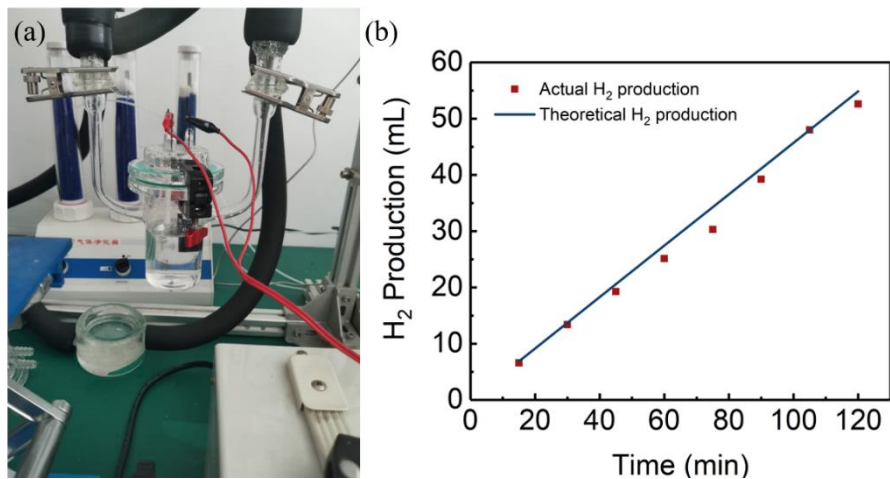

**Figure S18.** (a) Electrochemistry – gas chromatography in-situ measurement. (b) Actual and theoretical hydrogen production of Ru–N/BC in 0.5 M H<sub>2</sub>SO<sub>4</sub> solution.

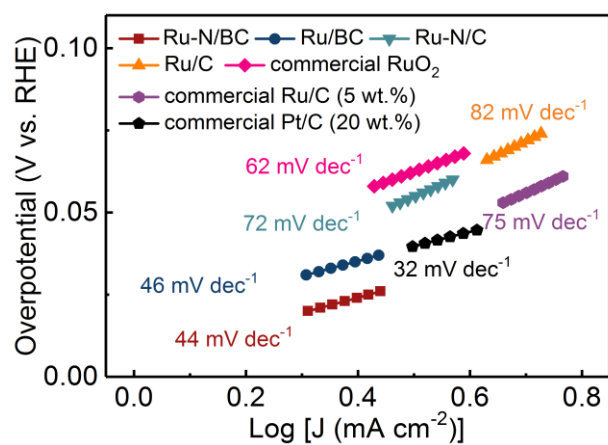

**Figure S19.** Tafel plots of the Ru–N/BC, Ru/BC, Ru–N/C, Ru/C, commercial RuO<sub>2</sub>, commercial Ru/C (5 wt.%) and commercial Pt/C (20 wt.%) electrodes in N<sub>2</sub>-saturated 1 M KOH solution at a sweep rate of 5 mV s<sup>-1</sup>.

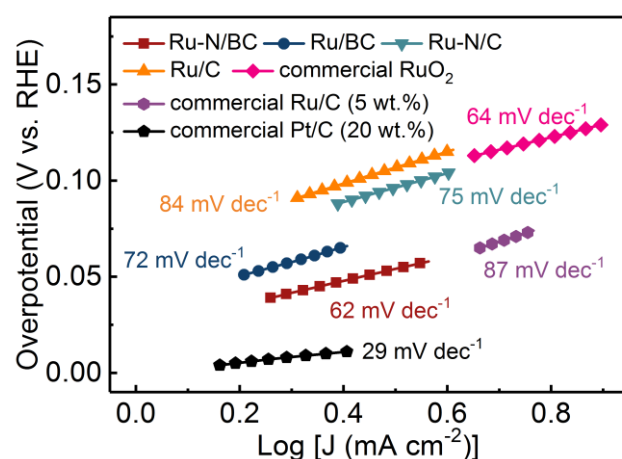

**Figure S20.** Tafel plots of the Ru–N/BC, Ru/BC, Ru–N/C, Ru/C, commercial RuO<sub>2</sub>, commercial Ru/C (5 wt.%) and commercial Pt/C (20 wt.%) electrodes in N<sub>2</sub>-saturated 0.5 M H<sub>2</sub>SO<sub>4</sub> solution at a sweep rate of 5 mV s<sup>-1</sup>.

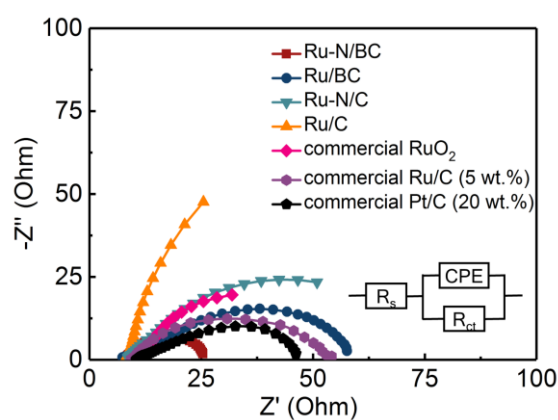

**Figure S21.** The Nyquist plots of the Ru–N/BC, Ru/BC, Ru–N/C, Ru/C, commercial RuO<sub>2</sub>, commercial Ru/C (5 wt.%) and commercial Pt/C (20 wt.%) electrodes at open circuit potential in N<sub>2</sub>-saturated 1 M KOH solution. Inset is the equivalent circuit, in which  $R_s$  is uncompensated resistance,  $R_{ct}$  is charge transfer resistance, and CPE is constant phase element (equivalent to the double-layer capacitance).

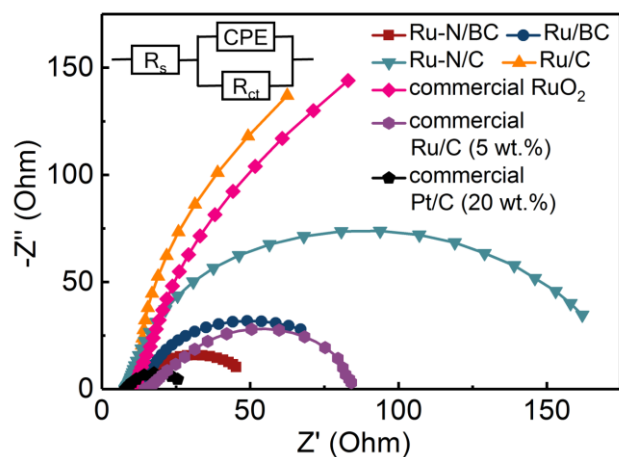

**Figure S22.** The Nyquist plots of the Ru–N/BC, Ru/BC, Ru–N/C, Ru/C, commercial RuO<sub>2</sub> commercial Ru/C (5 wt.%) and commercial Pt/C (20 wt.%) electrodes at open circuit potential in N<sub>2</sub>-saturated 0.5 M H<sub>2</sub>SO<sub>4</sub> solution. Inset is the equivalent circuit, in which  $R_s$  is uncompensated resistance,  $R_{ct}$  is charge transfer resistance, and CPE is constant phase element (equivalent to the double-layer capacitance).

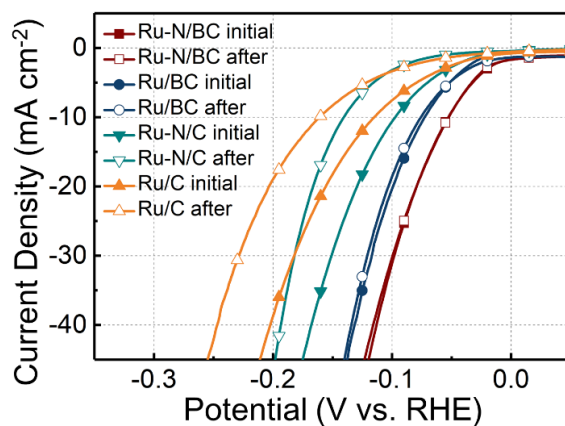

**Figure S23.** The durability of the Ru–N/BC, Ru/BC, Ru–N/C, Ru/C electrodes for 3000 cycles potential sweeps from 0.2 to -0.1 V in 1M KOH solution.

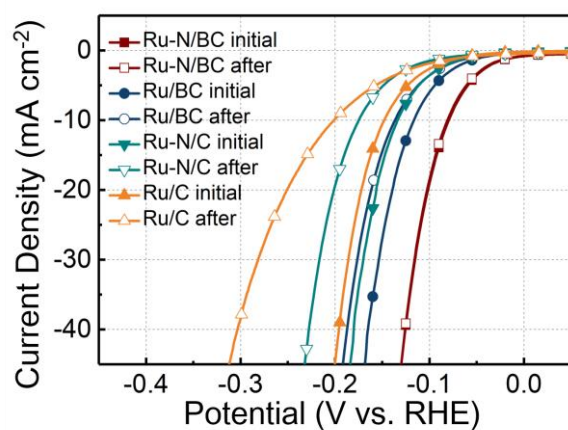

**Figure S24.** The durability of the Ru-N/BC, Ru/BC, Ru-N/C, Ru/C electrodes for 3000 cycles potential sweeps from 0.2 to -0.1 V in 0.5M H<sub>2</sub>SO<sub>4</sub> solution.

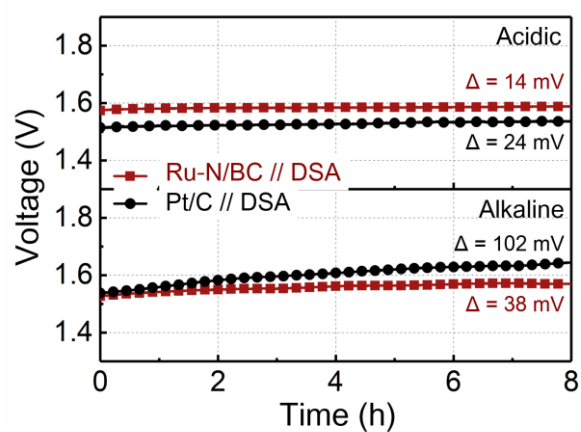

**Figure S25.** The chronopotentiometry tests of Ru-N/BC and commercial Pt/C in two electrode system with the DSA as the counter electrode in 0.5 M H<sub>2</sub>SO<sub>4</sub> and 1 M KOH solutions.

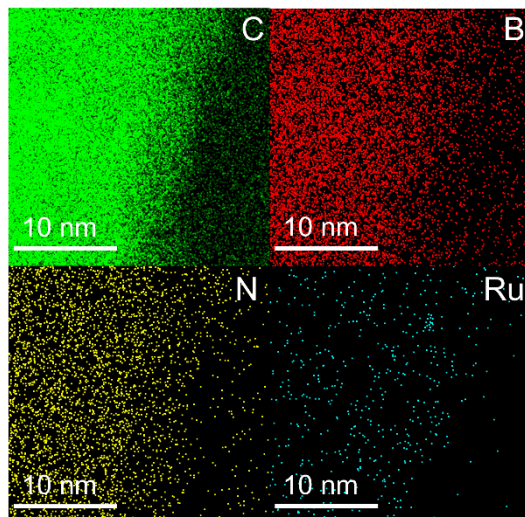

**Figure S26** Element distribution mapping images of Ru-N/BC after the chronopotentiometry testing in 0.5 M H<sub>2</sub>SO<sub>4</sub> solution.

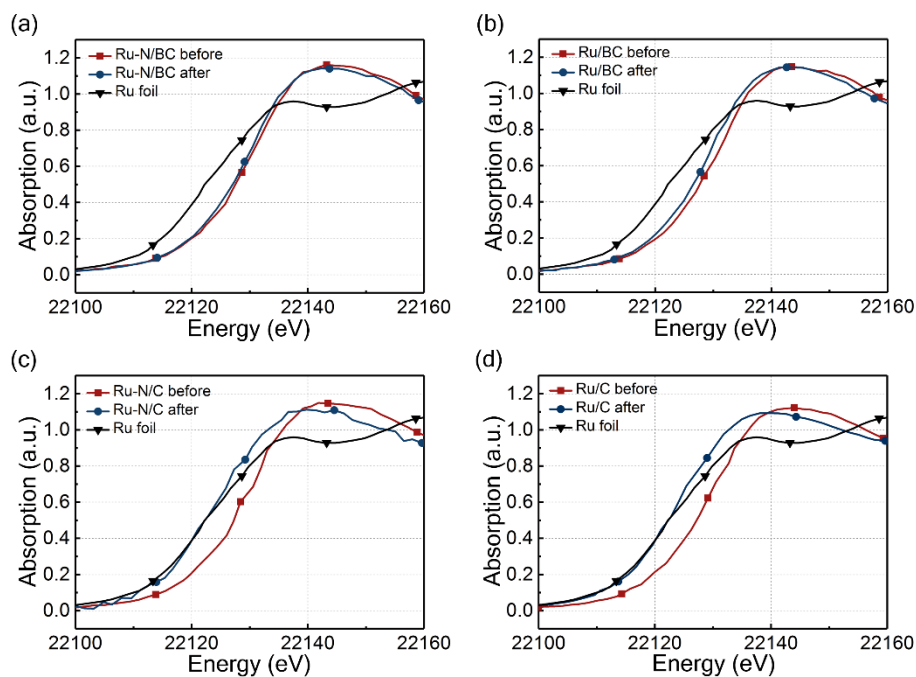

**Figure S27.** The normalized Ru *K*-edge XANES spectra of (a) Ru-N/BC, (b) Ru/BC, (c) Ru-N/C and (d) Ru/C before and after the long-term chronopotentiometry testing in 0.5 M H<sub>2</sub>SO<sub>4</sub> solution.

**Table S9.** Comparison of TOFs in alkaline and acidic electrolyte for Ru–N/BC with the reported noble metal based and non-noble metal electrocatalysts.

| Sample                              | Electrolyte                          | TOFs ( $\text{H}_2 \text{ s}^{-1}$ ) | Ref.      |
|-------------------------------------|--------------------------------------|--------------------------------------|-----------|
| Ru@C <sub>2</sub> N                 | 1M KOH                               | 0.75 $\text{H s}^{-1}$ at 50 mV      | S1        |
|                                     | 0.5 M H <sub>2</sub> SO <sub>4</sub> | 0.67 $\text{H s}^{-1}$ at 25 mV      |           |
| Ru/NG-750                           | 1 M KOH                              | 0.35 $\text{H s}^{-1}$ at 100 mV     | S2        |
|                                     | 0.5 M H <sub>2</sub> SO <sub>4</sub> | 0.04 $\text{H s}^{-1}$ at 100 mV     |           |
| Ru/C <sub>3</sub> N <sub>4</sub> /C | 1 M KOH                              | 4.20 $\text{H s}^{-1}$ at 100 mV     | S3        |
| Ru@NG                               | 1 M KOH                              | 0.44 $\text{H s}^{-1}$ at 50 mV      | S4        |
|                                     | 0.5 M H <sub>2</sub> SO <sub>4</sub> | 0.25 $\text{H s}^{-1}$ at 50 mV      |           |
| Ru@GnP                              | 1 M H <sub>2</sub> SO <sub>4</sub>   | 2.10 $\text{H s}^{-1}$ at 50 mV      | S5        |
| Ru@NC                               | 1 M KOH                              | 1.00 $\text{H s}^{-1}$ at 25 mV      | S6        |
| $\alpha$ -Mo <sub>2</sub> C         | 1 M KOH                              | 0.90 $\text{H s}^{-1}$ at 200 mV     | S7        |
| Mo <sub>2</sub> N                   | 1 M KOH                              | 0.07 $\text{H s}^{-1}$ at 250 mV     |           |
| Ni <sub>5</sub> P <sub>4</sub>      | 1 M KOH                              | 0.23 $\text{H s}^{-1}$ at 200 mV     | S8        |
| Ni-Mo                               | 1 M KOH                              | 0.05 $\text{H s}^{-1}$ at 100 mV     | S9        |
| UHVMoS <sub>2</sub>  Au(111)        | 0.5 M H <sub>2</sub> SO <sub>4</sub> | 1.00 $\text{H s}^{-1}$ at 100 mV     | S10       |
| RuP/NPC                             | 0.5 M H <sub>2</sub> SO <sub>4</sub> | 0.05 $\text{H s}^{-1}$ at 25 mV      | S11       |
| Rh <sub>x</sub> P/NPC               | 0.5 M H <sub>2</sub> SO <sub>4</sub> | 0.45 $\text{H s}^{-1}$ at 25 mV      |           |
| CoN <sub>x</sub> /C                 | 0.5 M H <sub>2</sub> SO <sub>4</sub> | 0.40 $\text{H s}^{-1}$ at 100 mV     | S12       |
| Co-NG                               | 0.5 M H <sub>2</sub> SO <sub>4</sub> | 0.40 $\text{H s}^{-1}$ at 150 mV     | S13       |
| CoP                                 | 0.5 M H <sub>2</sub> SO <sub>4</sub> | 0.05 $\text{H s}^{-1}$ at 100 mV     | S14       |
| Mo <sub>3</sub> S <sub>13</sub>     | 0.5 M H <sub>2</sub> SO <sub>4</sub> | 0.70 $\text{H s}^{-1}$ at 200 mV     | S15       |
| Ru–N/BC                             | 1 M KOH                              | 2.82 $\text{H s}^{-1}$ at 50 mV      | This work |
|                                     | 0.5 M H <sub>2</sub> SO <sub>4</sub> | 1.02 $\text{H s}^{-1}$ at 50 mV      |           |



## References

- S1. Mahmood, J.; Li, F.; Jung, S.-M.; Okyay, M. S.; Ahmad, I.; Kim, S.-J.; Park, N.; Jeong, H. Y.; Baek, J.-B., An efficient and pH-universal ruthenium-based catalyst for the hydrogen evolution reaction. *Nat. Nanotechnol.*, 2017, **12**, 441-446
- S2. Ye, R.; Liu, Y.; Peng, Z.; Wang, T.; Jalilov, A. S.; Yakobson, B. I.; Wei, S.-H.; Tour, J. M., High Performance Electrocatalytic Reaction of Hydrogen and Oxygen on Ruthenium Nanoclusters. *ACS Appl. Mater. Inter.*, 2017, **9**, 3785-3791.
- S3. Zheng, Y.; Jiao, Y.; Zhu, Y.; Li, L. H.; Han, Y.; Chen, Y.; Jaroniec, M.; Qiao, S.-Z., High Electrocatalytic Hydrogen Evolution Activity of an Anomalous Ruthenium Catalyst. *J. Am. Chem. Soc.*, 2016, **138**, 16174-16181.
- S4. Yang, J.; Guo, H.; Chen, S.; Li, Y.; Cai, C.; Gao, P.; Wang, L.; Zhang, Y.; Sun, R.; Niu, X.; Wang, Z., Anchoring and space-confinement effects to form ultrafine Ru nanoclusters for efficient hydrogen generation. *J. Mater. Chem. A*, 2018, **6**, 13859-13866.
- S5. Li, F.; Han, G.-F.; Noh, H.-J.; Ahmad, I.; Jeon, I.-Y.; Baek, J.-B., Mechanochemically Assisted Synthesis of a Ru Catalyst for Hydrogen Evolution with Performance Superior to Pt in Both Acidic and Alkaline Media. *Adv. Mater.*, 2018, **30**, 1803676.
- S6. Wang, Z.-L.; Sun, K.; Henzie, J.; Hao, X.; Li, C.; Takei, T.; Kang, Y.-M.; Yamauchi, Y., Spatially Confined Assembly of Monodisperse Ruthenium Nanoclusters in a Hierarchically Ordered Carbon Electrode for Efficient Hydrogen Evolution. *Angew. Chem. Int. Edit.*, 2018, **57**, 5848-5852.

- S7. Ma, L.; Ting, L. R. L.; Molinari, V.; Giordano, C.; Yeo, B. S., Efficient hydrogen evolution reaction catalyzed by molybdenum carbide and molybdenum nitride nanocatalysts synthesized via the urea glass route. *J. Mater. Chem. A*, 2015, **3**, 8361-8368.
- S8. Laursen, A. B.; Patraju, K. R.; Whitaker, M. J.; Retuerto, M.; Sarkar, T.; Yao, N.; Ramanujachary, K. V.; Greenblatt, M.; Dismukes, G. C., Nanocrystalline Ni<sub>5</sub>P<sub>4</sub>: a hydrogen evolution electrocatalyst of exceptional efficiency in both alkaline and acidic media. *Energy Environ. Sci.*, 2015, **8**, 1027-1034.
- S9. McKone, J. R.; Sadtler, B. F.; Werlang, C. A.; Lewis, N. S.; Gray, H. B., Ni–Mo Nanopowders for Efficient Electrochemical Hydrogen Evolution. *ACS Catal.*, 2013, **3**, 166-169.
- S10. Jaramillo, T. F.; Jørgensen, K. P.; Bonde, J.; Nielsen, J. H.; Horch, S.; Chorkendorff, I., Identification of Active Edge Sites for Electrochemical H<sub>2</sub> Evolution from MoS<sub>2</sub> Nanocatalysts. *Science*, 2007, **317**, 100-102.
- S11. Qin, Q.; Jang, H.; Chen, L.; Nam, G.; Liu, X.; Cho, J., Low Loading of Rh<sub>x</sub>P and RuP on N, P Codoped Carbon as Two Trifunctional Electrocatalysts for the Oxygen and Hydrogen Electrode Reactions. *Adv. Energy Mater.*, 2018, **8**, 1801478.
- S12. Liang, H.-W.; Brüller, S.; Dong, R.; Zhang, J.; Feng, X.; Müllen, K., Molecular metal–N<sub>x</sub> centres in porous carbon for electrocatalytic hydrogen evolution. *Nat. Commun.*, 2015, **6**, 7992.
- S13. Fei, H.; Dong, J.; Arellano-Jiménez, M. J.; Ye, G.; Dong Kim, N.; Samuel, E. L. G.; Peng, Z.; Zhu, Z.; Qin, F.; Bao, J.; Yacaman, M. J.; Ajayan, P. M.; Chen, D.; Tour,

J. M., Atomic cobalt on nitrogen-doped graphene for hydrogen generation. *Nat. Commun.*, 2015, **6**, 8668.

S14. Popczun, E. J.; Read, C. G.; Roske, C. W.; Lewis, N. S.; Schaak, R. E., Highly Active Electrocatalysis of the Hydrogen Evolution Reaction by Cobalt Phosphide Nanoparticles. *Angew. Chem. Int. Edit.*, 2014, **53**, 5427-5430.

S15. Kibsgaard, J.; Jaramillo, T. F.; Besenbacher, F., Building an appropriate active-site motif into a hydrogen-evolution catalyst with thiomolybdate  $[\text{Mo}_3\text{S}_{13}]^{2-}$  clusters. *Nat. Chem.*, 2014, **6**, 248-253.
